# Supplementary material for: Elevated hexosylceramides in Parkinson’s disease cause gene upregulations in neurons mimicking responses to pathogens
Source: NPJ Parkinsons Dis. 2025 Aug 30;11:268. doi: 10.1038/s41531-025-01114-9 (PMC12398573; doi:10.1038/s41531-025-01114-9)
Supplement: Supplementary file 2 — Supplementary Excel file [file 41531_2025_1114_MOESM2_ESM.xlsx]

## Sheet: Candidate-genes-log2TMM
RNAseq candidate differentially expressed genes in primary DRG neurons stimulated with GlcCer 24:1 versus vehicle
	Log2 normalized counts (TMM, EdgeR DEG)								Based on P-value, total counts and fold change
gene	GlcCer1	GlcCer2	GlcCer3	GlcCer4	Veh1	Veh2	Veh3	Veh4	Rank	Log2-Diff	Gene	description
Tmem104	3.59335	3.53219	3.83127	3.6325	2.74782	2.81824	2.60217	3.5292	1	0.722973	Tmem104	Transmembrane protein 104. (496 aa)
Mta1	3.50589	3.20101	3.64432	3.9726	2.46231	2.64409	2.44175	3.37934	2	0.849081	Mta1	Metastasis-associated protein MTA1; Transcriptional coregulator which can act as both a transcriptional corepressor and coactivator. As a part of the histone- deacetylase multiprotein complex (NuRD), regulates transcription of its targets by modifying the acetylation status of the target chromatin and cofactor accessibility to the target DNA. In conjunction with other components of NuRD, acts as …
Hoxa10	3.31325	2.89064	3.08984	3.43723	2.92182	2.00252	1.81353	2.66471	3	0.832094	Hoxa10	Homeobox protein Hox-A10; Sequence-specific transcription factor which is part of a developmental regulatory system that provides cells with specific positional identities on the anterior-posterior axis. Binds to the DNA sequence 5'-AA[AT]TTTTATTAC-3'; Belongs to the Abd-B homeobox family. (416 aa)
Gatd3a	3.16124	2.56876	2.64432	3.21132	1.7845	2.31296	2.39862	2.46676	4	0.655701	Gatd3a	glutamine amidotransferase like class 1 domain containing 3A (alias D10Jhu81e), mitochondrial
Podxl2	3.25005	3.12945	2.94767	2.8522	2.63227	1.88245	1.44148	2.33371	5	0.972364	Podxl2	Podocalyxin-like protein 2; Acts as a ligand for vascular selectins. Mediates rapid rolling of leukocytes over vascular surfaces through high affinity divalent cation-dependent interactions with E-, P- and L-selectins (By similarity); Belongs to the podocalyxin family. (603 aa)
Wfdc3	3.13816	2.91934	2.76214	2.37323	2.59168	1.35896	1.93923	1.77189	6	0.882779	Wfdc3	WAP four-disulfide core domain protein 3. (130 aa)
CD14	2.99132	3.8167	1.94785	2.72093	2.46231	2.31296	1.9982	1.90304	7	0.700076	Cd14	Monocyte differentiation antigen CD14; Coreceptor for bacterial lipopolysaccharide. In concert with LBP, binds to monomeric lipopolysaccharide and delivers it to the LY96/TLR4 complex, thereby mediating the innate immune response to bacterial lipopolysaccharide (LPS). Acts via MyD88, TIRAP and TRAF6, leading to NF-kappa-B activation, cytokine secretion and the inflammatory response. Acts as a cor…
Clstn3	2.76892	3.05415	2.6133	2.23573	2.36933	1.60692	1.0545	2.18682	8	0.863635	Clstn3	Calsyntenin-3; May modulate calcium-mediated postsynaptic signals. Complex formation with APBA2 and APP, stabilizes APP metabolism and enhances APBA2-mediated suppression of beta-APP40 secretion, due to the retardation of intracellular APP maturation. (956 aa)
Rtn4r	2.73855	2.37601	2.48207	2.57652	2.21723	1.26544	1.44148	1.90304	9	0.836493	Rtn4r	Reticulon-4 receptor; Receptor for RTN4, OMG and MAG. Functions as receptor for the sialylated gangliosides GT1b and GM1. Besides, functions as receptor for chondroitin sulfate proteoglycans. Can also bind heparin. Intracellular signaling cascades are triggered via the coreceptor NGFR (By similarity). Signaling mediates activation of Rho and downstream reorganization of the actin cytoskeleton. Me…
Hoxb9	2.64339	2.41684	2.44732	2.4163	2.10635	1.44626	0.676267	1.77189	10	0.980773	Hoxb9	Homeobox protein Hox-B9; Sequence-specific transcription factor which is part of a developmental regulatory system that provides cells with specific positional identities on the anterior-posterior axis; Belongs to the Abd-B homeobox family. (250 aa)
Xrra1	1.76893	2.05415	2.97233	2.49876	1.71017	1.44626	1.67627	1.46676	11	0.748678	Xrra1	X-ray radiation resistance-associated protein 1; May be involved in the response of cells to X-ray radiation. (786 aa)
Efna2	2.61023	2.05415	1.84479	2.23573	1.7845	1.52857	0.676267	1.70133	12	0.763557	Efna2	Ephrin-A2; Cell surface GPI-bound ligand for Eph receptors, a family of receptor tyrosine kinases which are crucial for migration, repulsion and adhesion during neuronal, vascular and epithelial development. Binds promiscuously Eph receptors residing on adjacent cells, leading to contact-dependent bidirectional signaling into neighboring cells. The signaling pathway downstream of the receptor is …
Spi1	2.09085	2.41684	2.37518	1.97269	1.63227	1.05936	1.16156	1.70133	13	0.825262	Spi1	Transcription factor PU.1; Binds to the PU-box, a purine-rich DNA sequence (5'-GAGGAA- 3') that can act as a lymphoid-specific enhancer. This protein is a transcriptional activator that may be specifically involved in the differentiation or activation of macrophages or B-cells. Also binds RNA and may modulate pre-mRNA splicing. (272 aa)
Tbkbp1	2.43189	2.33428	2.17728	1.97269	1.46258	0.358396	0.813935	2.07998	14	1.05032	Tbkbp1	TANK-binding kinase 1-binding protein 1; Adapter protein which constitutively binds TBK1 and IKBKE playing a role in antiviral innate immunity. Essential for the efficient induction of IRF-dependent transcription following infection with Sendai virus. (610 aa)
Spred3	1.93885	1.89064	1.89724	2.08372	1.54992	0.680774	1.26123	1.37962	15	0.734728	Spred3	Sprouty-related, EVH1 domain-containing protein 3; Tyrosine kinase substrate that inhibits growth-factor- mediated activation of MAP kinase. (408 aa)
Fadd	1.93885	2.29131	1.61353	2.23573	1.16285	0.943359	0.813935	1.62714	16	0.883032	Fadd	FAS-associated death domain protein; Apoptotic adaptor molecule that recruits caspase-8 or caspase-10 to the activated Fas (CD95) or TNFR-1 receptors. The resulting aggregate called the death-inducing signaling complex (DISC) performs caspase-8 proteolytic activation. Active caspase-8 initiates the subsequent cascade of caspases mediating apoptosis (By similarity). Involved in interferon-mediated…
Gprc5a	2.13816	1.89064	1.99675	1.65077	1.54992	0.818032	1.44148	0.964214	17	0.725668	Gprc5a	Retinoic acid-induced protein 3; Orphan receptor. Could be involved in modulating differentiation and maintaining homeostasis of epithelial cells. This retinoic acid-inducible GPCR provides evidence for a possible interaction between retinoid and G-protein signaling pathways. Functions as a negative modulator of EGFR signaling. Acts as a lung tumor suppressor. (356 aa)
Ccdc69	1.18396	1.7062	2.29924	1.78827	1.04754	1.16607	0.813935	1.37962	18	0.642627	Ccdc69	Coiled-coil domain-containing protein 69; May act as a scaffold to regulate the recruitment and assembly of spindle midzone components. Required for the localization of AURKB and PLK1 to the spindle midzone. (202 aa)
Rac2	1.76893	1.94711	1.79035	1.4163	1.36905	0.529071	1.16156	1.28629	19	0.644178	Rac2	Ras-related C3 botulinum toxin substrate 2; Plasma membrane-associated small GTPase which cycles between an active GTP-bound and inactive GDP-bound state. In active state binds to a variety of effector proteins to regulate cellular responses, such as secretory processes, phagocytose of apoptotic cells and epithelial cell polarization. Augments the production of reactive oxygen species (ROS) by NA…
Ly6g6d	1.70752	2.05415	1.61353	1.65077	1.46258	0.529071	0.676267	1.46676	20	0.722826	Ly6g6d	Lymphocyte antigen 6 complex locus protein G6d. (135 aa)
Zfp689	2.43189	1.56852	1.41197	1.32884	1.16285	0.943359	0.93885	0.964214	21	0.682984	Zfp689	Zinc finger protein 689; May be involved in transcriptional regulation; Belongs to the krueppel C2H2-type zinc-finger protein family. (500 aa)
Fn3k	1.64339	1.77019	1.73379	1.57676	1.16285	1.35896	0.353888	0.186501	22	0.915485	Fn3k	Fructosamine-3-kinase; Fructosamine-3-kinase involved in protein deglycation by mediating phosphorylation of fructoselysine residues on glycated proteins, to generate fructoselysine-3 phosphate. Fructoselysine-3 phosphate adducts are unstable and decompose under physiological conditions (By similarity). Involved in intracellular deglycation in erythrocytes and pancreatic islets. Involved in the r…
Tusc1	1.82782	1.77019	0.996389	1.97269	1.36905	0.818032	0.524064	-0.03505	23	0.97275	Tusc1	Tumor suppressor candidate gene 1 protein homolog. (205 aa)
Trem2	2.43189	2.15381	1.25942	1.32884	0.922198	1.16607	-1.0619	-0.03505	24	1.54566	Trem2	Triggering receptor expressed on myeloid cells 2; Forms a receptor signaling complex with TYROBP which mediates signaling and cell activation following ligand binding. Acts as a receptor for amyloid-beta protein 42, a cleavage product of the amyloid-beta precursor protein APP, and mediates its uptake and degradation by microglia. Binding to amyloid-beta 42 mediates microglial activation, prolifer…
Nfatc4	0.768925	1.41684	1.67491	1.65077	0.462576	0.818032	0.353888	0.839153	25	0.759448	Nfatc4	Nuclear factor of activated T-cells, cytoplasmic 4; Ca(2+)-regulated transcription factor that is involved in several processes, including the development and function of the immune, cardiovascular, musculoskeletal, and nervous systems. Involved in T-cell activation, stimulating the transcription of cytokine genes, including that of IL2 and IL4. Along with NFATC3, involved in embryonic heart deve…
Echdc3	0.991318	1.24671	1.61353	1.23573	0.922198	0.166073	0.16221	1.07997	26	0.689208	Echdc3	Enoyl-CoA hydratase domain-containing protein 3, mitochondrial; May play a role in fatty acid biosynthesis and insulin sensitivity; Belongs to the enoyl-CoA hydratase/isomerase family. (300 aa)
Dynlrb2	1.35389	1.1538	1.0895	1.57676	0.922198	1.05936	-0.32373	-0.03505	27	0.887795	Dynlrb2	Dynein light chain roadblock-type 2; Acts as one of several non-catalytic accessory components of the cytoplasmic dynein 1 complex that are thought to be involved in linking dynein to cargos and to adapter proteins that regulate dynein function. Cytoplasmic dynein 1 acts as a motor for the intracellular retrograde motility of vesicles and organelles along microtubules; Belongs to the GAMAD family…
Dpf1	1.18396	1.7062	1.25942	0.788268	0.462576	-0.05589	0.524064	0.839153	28	0.791988	Dpf1	Zinc finger protein neuro-d4; May have an important role in developing neurons by participating in regulation of cell survival, possibly as a neurospecific transcription factor. Belongs to the neuron-specific chromatin remodeling complex (nBAF complex). During neural development a switch from a stem/progenitor to a post-mitotic chromatin remodeling mechanism occurs as neurons exit the cell cycle …
Swsap1	1.50589	1.24671	0.896853	1.32884	1.04754	0.680774	-0.32373	-0.03505	29	0.90219	Swsap1	ATPase SWSAP1; ATPase which is preferentially stimulated by single-stranded DNA and is involved in homologous recombination repair (HRR). Has a DNA-binding activity which is independent of its ATPase activity (By similarity). (278 aa)
Sh3d21	0.991318	1.0545	1.25942	1.02928	-0.21591	-0.05589	0.353888	1.07997	30	0.793114	Sh3d21	SH3 domain-containing protein 21. (665 aa)
Cstad	1.27143	0.831877	1.41197	1.4163	0.462576	0.1	-0.32373	0.186501	31	1.12656	Cstad	CSA-conditional, T cell activation-dependent protein. (104 aa)
Mamstr	1.64339	0.947105	1.61353	0.650765	-0.21591	0.358396	-1.0619	0.839153	32	1.23376	Mamstr	MEF2-activating motif and SAP domain-containing transcriptional regulator; Transcriptional coactivator. Stimulates the transcriptional activity of MEF2C. Stimulates MYOD1 activity in part via MEF2, resulting in an enhancement of skeletal muscle differentiation. (421 aa)
Zfp108	0.353888	1.1538	0.789938	0.913799	0.462576	-0.32013	0.353888	-0.03505	33	0.687536	Zfp108	Zinc finger protein 108. (642 aa)
Tpsg1	1.27143	0.831877	1.25942	0.650765	-0.53742	-0.6416	-0.0604	0.379621	34	1.21832	Tpsg1	Tryptase gamma heavy chain; Belongs to the peptidase S1 family. Tryptase subfamily. (311 aa)
Kcnd1	1.18396	1.1538	0.674461	-0.0862	0.04684	-0.05589	-0.0604	-0.03505	35	0.757632	Kcnd1	Potassium voltage-gated channel subfamily D member 1; Pore-forming (alpha) subunit of voltage-gated rapidly inactivating A-type potassium channels. May contribute to I(To) current in the heart and I(Sa) current in neurons. Channel properties are modulated by subunit assembly; Belongs to the potassium channel family. D (Shal) (TC 1.A.1.2) subfamily. Kv4.1/KCND1 sub-subfamily. (651 aa)
Gnb3	1.27143	1.41684	0.996389	0.913799	0.04684	-1.63935	-1.0619	0.54893	36	1.67598	Gnb3	Guanine nucleotide-binding protein G(I)/G(S)/G(T) subunit beta-3; Guanine nucleotide-binding proteins (G proteins) are involved as a modulator or transducer in various transmembrane signaling systems. The beta and gamma chains are required for the GTPase activity, for replacement of GDP by GTP, and for G protein-effector interaction. (340 aa)
Rem1	0.991318	0.41684	0.674461	0.328836	-0.21591	0.166073	0.353888	-0.62149	37	0.682224	Rem1	GTP-binding protein REM 1; Promotes endothelial cell sprouting and actin cytoskeletal reorganization (By similarity). May be involved in angiogenesis. May function in Ca(2+) signaling; Belongs to the small GTPase superfamily. RGK family. (297 aa)
Nat3	0.768925	0.947105	1.89724	0.498761	-1.53952	-1.05589	-0.32373	0.701327	38	1.58246	Nat3	Arylamine N-acetyltransferase 3; Participates in the detoxification of a plethora of hydrazine and arylamine drugs. (290 aa)
Prob1	0.505891	0.568519	0.54893	0.650765	0.632268	-0.6416	-1.0619	-0.29867	39	0.911002	Prob1	Proline-rich basic protein 1. (1010 aa)
Nxph3	0.505891	0.41684	1.33743	0.328836	-0.21591	-0.6416	-1.64386	-0.03505	40	1.28135	Nxph3	Neurexophilin-3; May be signaling molecules that resemble neuropeptides. Ligand for alpha-neurexins; Belongs to the neurexophilin family. (252 aa)
Adora1	3.96532	3.78597	3.53269	3.8523	4.48478	4.12697	4.43109	3.9644	41	-0.46774	Adora1	Adenosine receptor A1; Receptor for adenosine. The activity of this receptor is mediated by G proteins which inhibit adenylyl cyclase; Belongs to the G-protein coupled receptor 1 family. (326 aa)
Spice1	3.04194	3.12945	3.77631	3.30597	4.10626	3.94373	3.9981	3.73693	42	-0.632839	Spice1	Spindle and centriole-associated protein 1; Regulator required for centriole duplication, for proper bipolar spindle formation and chromosome congression in mitosis. (860 aa)
Ppp1r3d	1.09085	1.49467	1.67491	1.13619	1.98586	2.26574	2.05485	1.54942	43	-0.614811	Ppp1r3d	Protein phosphatase 1, regulatory subunit 3D. (279 aa)
Best2	0.991318	0.41684	1.25942	1.02928	1.26963	1.60692	1.67627	2.07998	44	-0.733983	Best2	Bestrophin-2; Forms calcium-sensitive chloride channels. Permeable to bicarbonate. (508 aa)
C1ql3	-0.00868	1.1538	0.896853	0.328836	1.16285	1.68077	1.9982	1.77189	45	-1.06072	C1ql3	Complement C1q-like protein 3; May regulate the number of excitatory synapses that are formed on hippocampus neurons. Has no effect on inhibitory synapses. Plays a role in glucose homeostasis. Via AMPK signaling pathway, stimulates glucose uptake in adipocytes, myotubes and hepatocytes and enhances insulin-stimulated glucose uptake. In a hepatoma cell line, reduces the expression of gluconeogenic…
Teddm1b	0.183963	0.41684	0.896853	0.913799	0.784085	1.52857	1.67627	1.96421	46	-0.88542	Teddm1b	Transmembrane epididymal protein 1B. (306 aa)
Riiad1	0.505891	0.41684	0.674461	0.788268	1.85479	1.16607	1.26123	1.54942	47	-0.861515	Riiad1	RIIa domain-containing protein 1. (119 aa)
Halr1	0.505891	0.947105	0.089498	0.328836	1.36905	1.81803	0.93885	0.964214	48	-0.804704	Halr1	Hoxa adjacent long noncoding RNA 1
Sap25	0.183963	0.41684	0.2	0.1	1.26963	1.60692	1.0545	1.54942	49	-1.14492	Sap25	Histone deacetylase complex subunit SAP25; Involved in the transcriptional repression mediated by the mSIN3A but not the N-CoR corepressor complex. (261 aa)
Ccdc120	0.353888	-0.16812	0.789938	0.498761	0.632268	1.16607	0.93885	1.54942	50	-0.703037	Ccdc120	Coiled-coil domain-containing protein 120; Centriolar protein required for centriole subdistal appendage assembly and microtubule anchoring in interphase cells. Together with CCDC68, cooperate with subdistal appendage components ODF2, NIN and CEP170 for hierarchical subdistal appendage assembly. Recruits NIN and CEP170 to centrosomes. Also required for neurite growth (By similarity). Localizes CY…

## Sheet: Panther GO BP slim
RNAseq candidate DEGs Panther GO slim
Mus musculus (REF)
PANTHER GO-Slim Biological Process	#	#	expected	Fold Enrichment	+/-	raw P value
regulation of cellular process	5475	19	12.04	1.58	+	0.0288
leukocyte differentiation	18	1	0.04	25.27	+	0.0389
myeloid cell differentiation	15	1	0.03	30.33	+	0.0325
toll-like receptor 4 signaling pathway	4	1	0.01	> 100	+	0.00876
pattern recognition receptor signaling pathway	23	1	0.05	19.78	+	0.0494
regulation of immune system process	332	3	0.73	4.11	+	0.0364
positive regulation of immune system process	236	3	0.52	5.78	+	0.0151
positive regulation of innate immune response	53	2	0.12	17.17	+	0.00607
regulation of innate immune response	64	2	0.14	14.22	+	0.00875
regulation of response to external stimulus	124	3	0.27	11.01	+	0.00257
regulation of defense response	105	3	0.23	13	+	0.0016
regulation of response to stress	147	3	0.32	9.28	+	0.00414
regulation of response to biotic stimulus	65	2	0.14	14	+	0.00901
positive regulation of response to external stimulus	71	3	0.16	19.22	+	0.000513
positive regulation of defense response	59	3	0.13	23.13	+	0.000297
positive regulation of response to biotic stimulus	54	2	0.12	16.85	+	0.0063
regulation of macrophage activation	4	1	0.01	> 100	+	0.00876
regulation of multicellular organismal process	328	3	0.72	4.16	+	0.0353
positive regulation of phagocytosis	5	1	0.01	90.98	+	0.0109
positive regulation of endocytosis	8	1	0.02	56.86	+	0.0175
regulation of cellular component organization	372	4	0.82	4.89	+	0.00894
positive regulation of cellular component organization	129	2	0.28	7.05	+	0.0327
positive regulation of inflammatory response	6	1	0.01	75.82	+	0.0131
regulation of centriole replication	7	1	0.02	64.99	+	0.0153
regulation of centrosome duplication	8	1	0.02	56.86	+	0.0175
regulation of centrosome cycle	8	1	0.02	56.86	+	0.0175
regulation of cellular component biogenesis	145	2	0.32	6.27	+	0.0405
calcineurin-mediated signaling	10	1	0.02	45.49	+	0.0218
cytokine production	10	1	0.02	45.49	+	0.0218
cellular metabolic process	3153	2	6.93	0.29	-	0.0392
metaphase chromosome alignment	13	1	0.03	34.99	+	0.0282
establishment of chromosome localization	19	1	0.04	23.94	+	0.041
chromosome localization	19	1	0.04	23.94	+	0.041
positive regulation of synapse assembly	13	1	0.03	34.99	+	0.0282
positive regulation of multicellular organismal process	153	3	0.34	8.92	+	0.00463
regulation of cell junction assembly	18	1	0.04	25.27	+	0.0389
mitotic spindle assembly	14	1	0.03	32.49	+	0.0303
positive regulation of ERK1 and ERK2 cascade	18	1	0.04	25.27	+	0.0389
regulation of MAPK cascade	136	2	0.3	6.69	+	0.036
regulation of ERK1 and ERK2 cascade	22	1	0.05	20.68	+	0.0473
positive regulation of synaptic transmission	22	1	0.05	20.68	+	0.0473
regulation of peptidyl-tyrosine phosphorylation	22	1	0.05	20.68	+	0.0473
extrinsic apoptotic signaling pathway	23	1	0.05	19.78	+	0.0494
axon guidance	103	2	0.23	8.83	+	0.0216
axonogenesis	131	2	0.29	6.95	+	0.0337
cell morphogenesis involved in neuron differentiation	137	2	0.3	6.64	+	0.0365
axon development	151	2	0.33	6.03	+	0.0436
neuron projection morphogenesis	163	2	0.36	5.58	+	0.05
neuron projection guidance	103	2	0.23	8.83	+	0.0216
nitrogen compound metabolic process	3166	2	6.96	0.29	-	0.0391
primary metabolic process	3509	2	7.71	0.26	-	0.018

## Sheet: GO-terms-genes
RNAseq candidate DEGs Panther GO
	Lipoprotein			Cell membrane
CD14	CD14 molecule(CD14)		CD14	CD14 molecule(CD14)
Rac2	Rac family small GTPase 2(RAC2)		Gprc5a	G protein-coupled receptor class C group 5 member A(GPRC5A)
Adora1	adenosine A1 receptor(ADORA1)		Adora1	adenosine A1 receptor(ADORA1)
Ccdc69	coiled-coil domain containing 69(CCDC69)		Best2	bestrophin 2(BEST2)
Efna2	ephrin A2(EFNA2)		Clstn3	calsyntenin 3(CLSTN3)
Ly6g6d	lymphocyte antigen 6 family member G6D(LY6G6D)		Efna2	ephrin A2(EFNA2)
Rtn4r	reticulon 4 receptor(RTN4R)		Ly6g6d	lymphocyte antigen 6 family member G6D(LY6G6D)
Spred3	sprouty related EVH1 domain containing 3(SPRED3)		Rtn4r	reticulon 4 receptor(RTN4R)
			Spred3	sprouty related EVH1 domain containing 3(SPRED3)
			Trem2	triggering receptor expressed on myeloid cells 2(TREM2)
	Glycoprotein
CD14	CD14 molecule(CD14)
Fadd	Fas associated via death domain(FADD)			Plasma membrane
Gprc5a	G protein-coupled receptor class C group 5 member A(GPRC5A)		CD14	CD14 molecule(CD14)
Rac2	Rac family small GTPase 2(RAC2)		Fadd	Fas associated via death domain(FADD)
Wfdc3	WAP four-disulfide core domain 3(WFDC3)		Gnb3	G protein subunit beta 3(GNB3)
Adora1	adenosine A1 receptor(ADORA1)		Gprc5a	G protein-coupled receptor class C group 5 member A(GPRC5A)
Clstn3	calsyntenin 3(CLSTN3)		Rem1	RRAD and GEM like GTPase 1(REM1)
Efna2	ephrin A2(EFNA2)		Rac2	Rac family small GTPase 2(RAC2)
Ly6g6d	lymphocyte antigen 6 family member G6D(LY6G6D)		Sh3d21	SH3 domain containing 21(SH3D21)
Nxph3	neurexophilin 3(NXPH3)		Adora1	adenosine A1 receptor(ADORA1)
Podxl2	podocalyxin like 2(PODXL2)		Best2	bestrophin 2(BEST2)
Kcnd1	potassium voltage-gated channel subfamily D member 1(KCND1)		Efna2	ephrin A2(EFNA2)
Rtn4r	reticulon 4 receptor(RTN4R)		Ly6g6d	lymphocyte antigen 6 family member G6D(LY6G6D)
Tmem104	transmembrane protein 104(TMEM104)		Podxl2	podocalyxin like 2(PODXL2)
Trem2	triggering receptor expressed on myeloid cells 2(TREM2)		Kcnd1	potassium voltage-gated channel subfamily D member 1(KCND1)
Tpsg1	tryptase gamma 1(TPSG1)		Rtn4r	reticulon 4 receptor(RTN4R)
			Spred3	sprouty related EVH1 domain containing 3(SPRED3)
			Trem2	triggering receptor expressed on myeloid cells 2(TREM2)
	external side of membrane, GPI anchor		Tpsg1	tryptase gamma 1(TPSG1)
CD14	CD14 molecule(CD14)
Ly6g6d	lymphocyte antigen 6 family member G6D(LY6G6D)
Rtn4r	reticulon 4 receptor(RTN4R)			Transmembrane
Efna2	ephrin A2(EFNA2)		Gprc5a	G protein-coupled receptor class C group 5 member A(GPRC5A)
			Spi1	Spi-1 proto-oncogene(SPI1)
	Regulation of transcription		Adora1	adenosine A1 receptor(ADORA1)
Mamstr	MEF2 activating motif and SAP domain containing transcriptional regulator(MAMSTR)		Best2	bestrophin 2(BEST2)
Sap25	Sin3A associated protein 25(SAP25)		Clstn3	calsyntenin 3(CLSTN3)
Spi1	Spi-1 proto-oncogene(SPI1)		Ly6g6d	lymphocyte antigen 6 family member G6D(LY6G6D)
Dpf1	double PHD fingers 1(DPF1)		Podxl2	podocalyxin like 2(PODXL2)
Hoxa10	homeobox A10(HOXA10)		Kcnd1	potassium voltage-gated channel subfamily D member 1(KCND1)
Hoxb9	homeobox B9(HOXB9)		Tmem104	transmembrane protein 104(TMEM104)
Mta1	metastasis associated 1(MTA1)		Trem2	triggering receptor expressed on myeloid cells 2(TREM2)
Nfatc4	nuclear factor of activated T cells 4(NFATC4)		Tpsg1	tryptase gamma 1(TPSG1)
